# Supplementary material
Source: PubMed Central journal article supplement (PMC2760107)

# Figure 1S

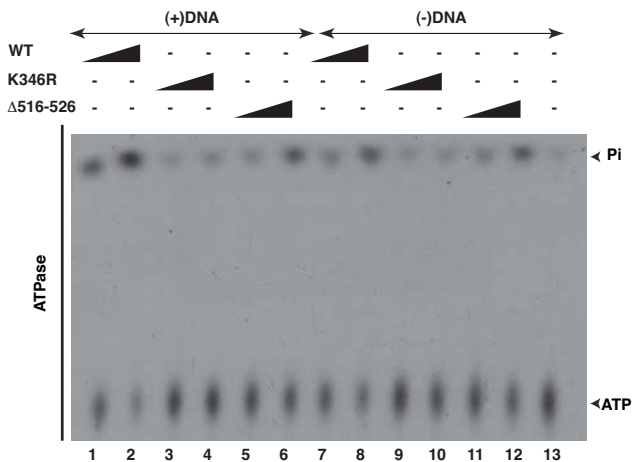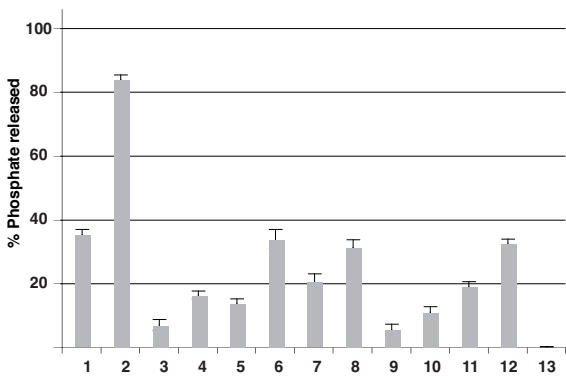

Supplement: emboj2009230s1.pdf [file emboj2009230s1.pdf]
